# Supplementary material for: Optimizing the Pharmacological Properties of Discoidal Polymeric Nanoconstructs Against Triple-Negative Breast Cancer Cells
Source: PubMed Central journal article supplement (PMC7042398; doi:10.3389/fbioe.2020.00005), 2020-02-19
Supplement: Data_Sheet_1.pdf [file Data_Sheet_1.pdf]

# **SUPPORTING INFORMATION**

## **OPTIMIZING THE PHARMACOLOGICAL PROPERTIES OF DISCOIDAL POLYMERIC NANOCONSTRUCTS AGAINST TRIPLE NEGATIVE BREAST CANCER CELLS**

Miguel Ferreira<sup>1</sup>, Ilaria Francesca Rizzuti<sup>1,2</sup>, Anna Lisa Palange<sup>1</sup>, Maria Grazia Barbato<sup>1,2</sup>, Valentina Di Francesco<sup>1,2</sup>, Martina Di Francesco<sup>1</sup>, and Paolo Decuzzi<sup>1\*</sup>

<sup>1</sup> Laboratory of Nanotechnology for Precision Medicine, Fondazione Istituto Italiano di Tecnologia, Via Morego 30, Genoa 16163, Italy

<sup>2</sup> Department of Informatics, Bioengineering, Robotics and System Engineering, University of Genoa, Via Opera Pia, 13 Genoa 16145, Italy

\* Corresponding author: Paolo Decuzzi Ph.D., [paolo.decuzzi@iit.it](mailto:paolo.decuzzi@iit.it)

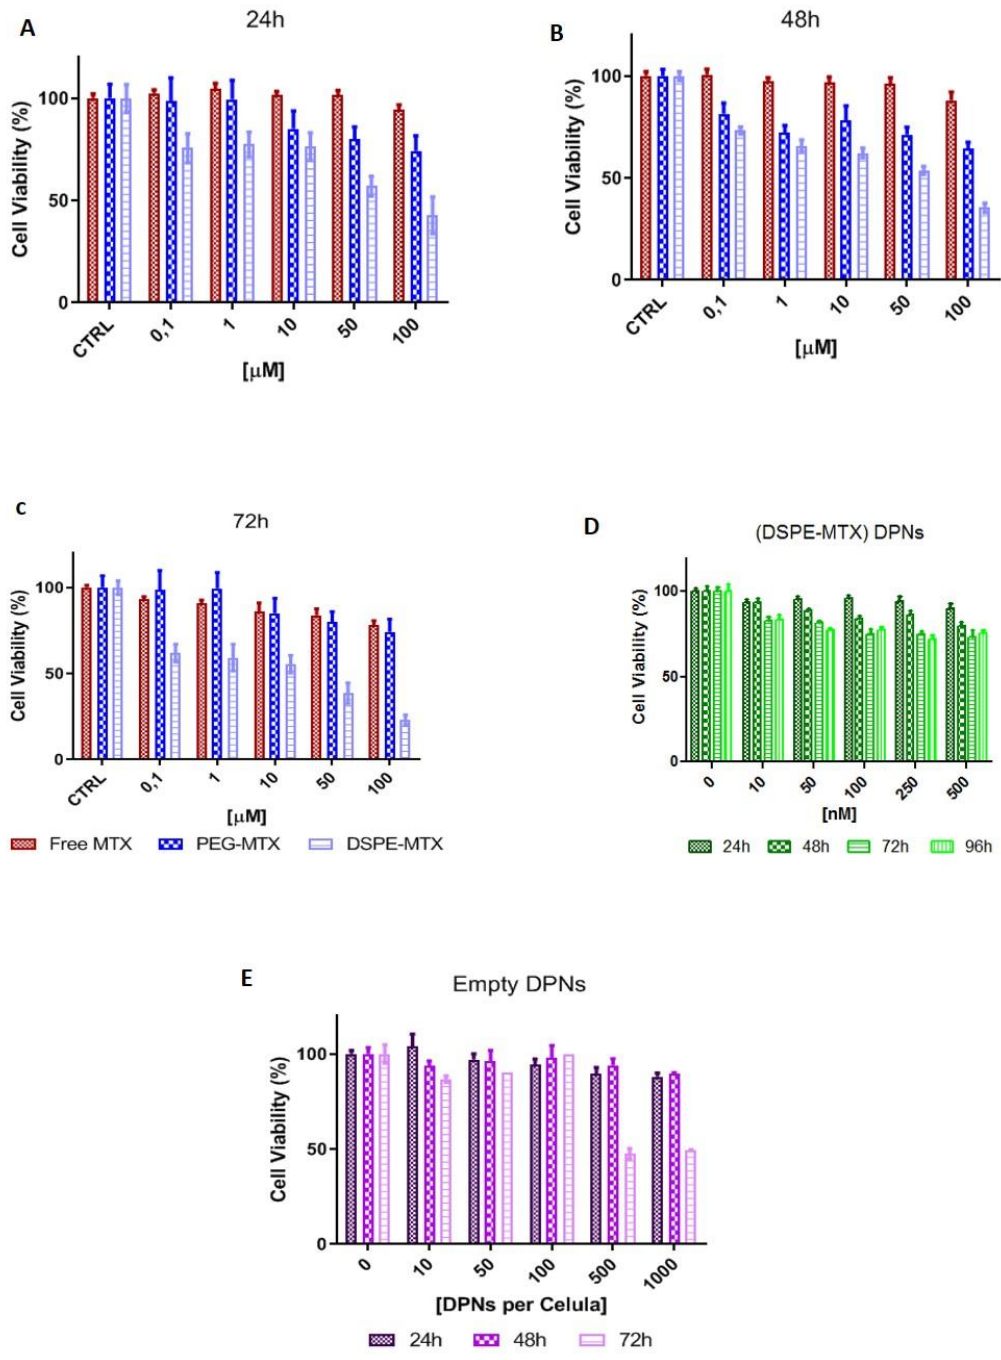

**Supplementary Figure. 1. Cytotoxic activity of MTX prodrugs and MTX-loaded DPNs** **A.** Cell viability analysis of **A.** free-MTX; **B.** PEG-MTX; and **C.** DSPE-MTX at 24, 48, and 72 post-incubation with MDA-MB-231. **D.** Cell viability of DSPE-MTX DPNs at 24, 48, 72 and 96h post-incubation with MDA-MB-231. **E.** Cell viability of empty DPNs at 24, 48, and 72 h post-incubation with MDA-MB-231.

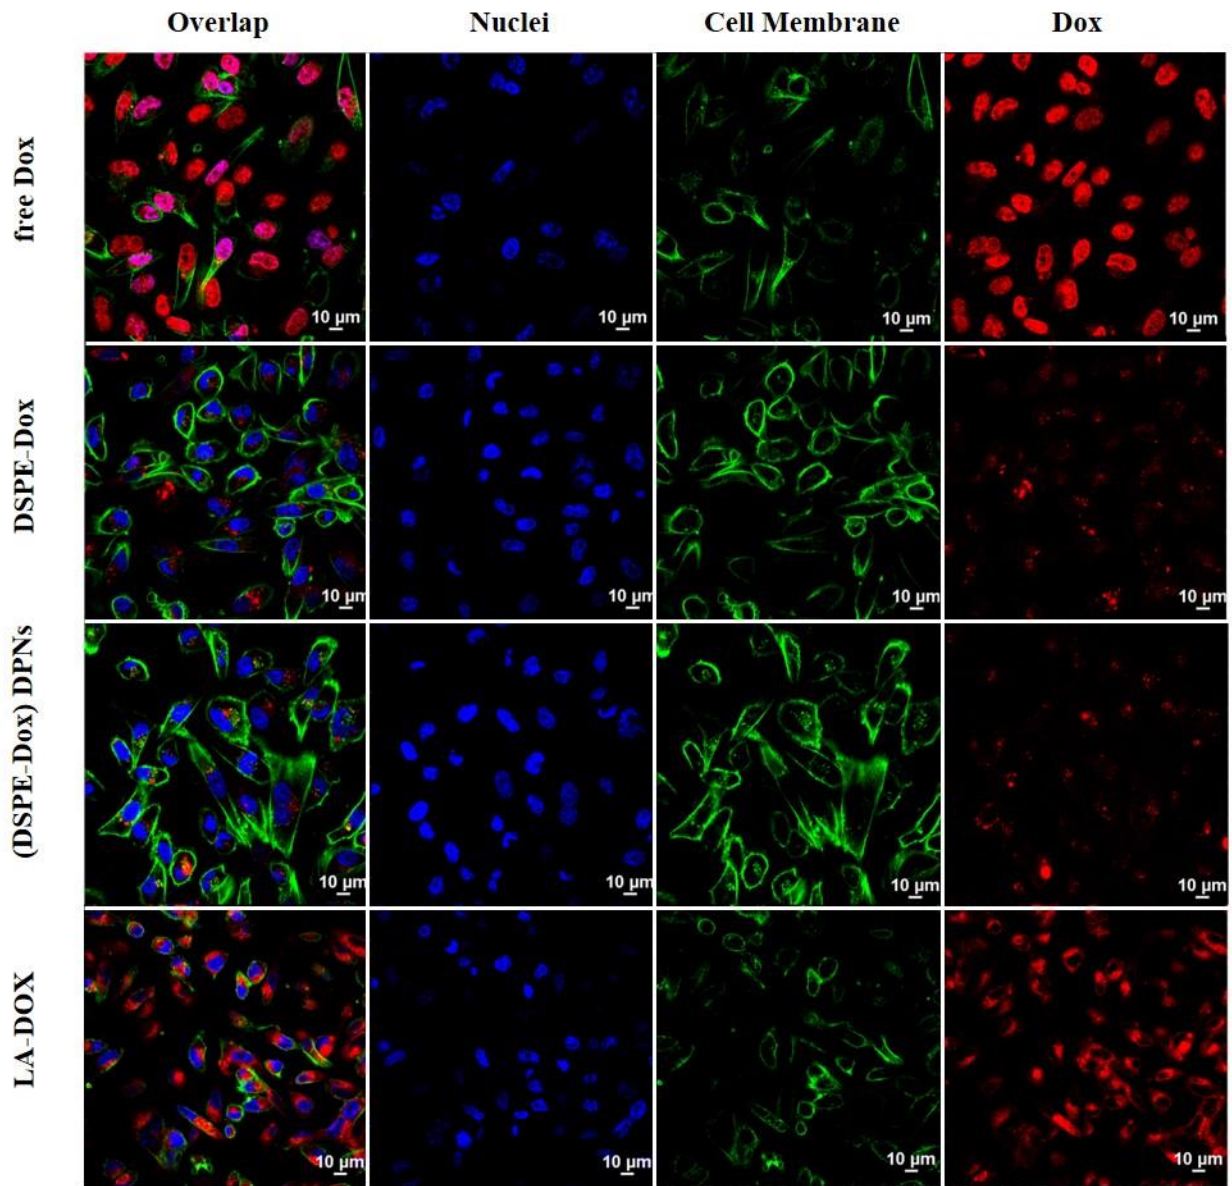

**Supplementary Figure.2.** Confocal microscopy analysis of free-DOX, DSPE-DOX, (DSPE-DOX)DPNs and LA-DOX at 24h post-incubation with MDA-MB-231.

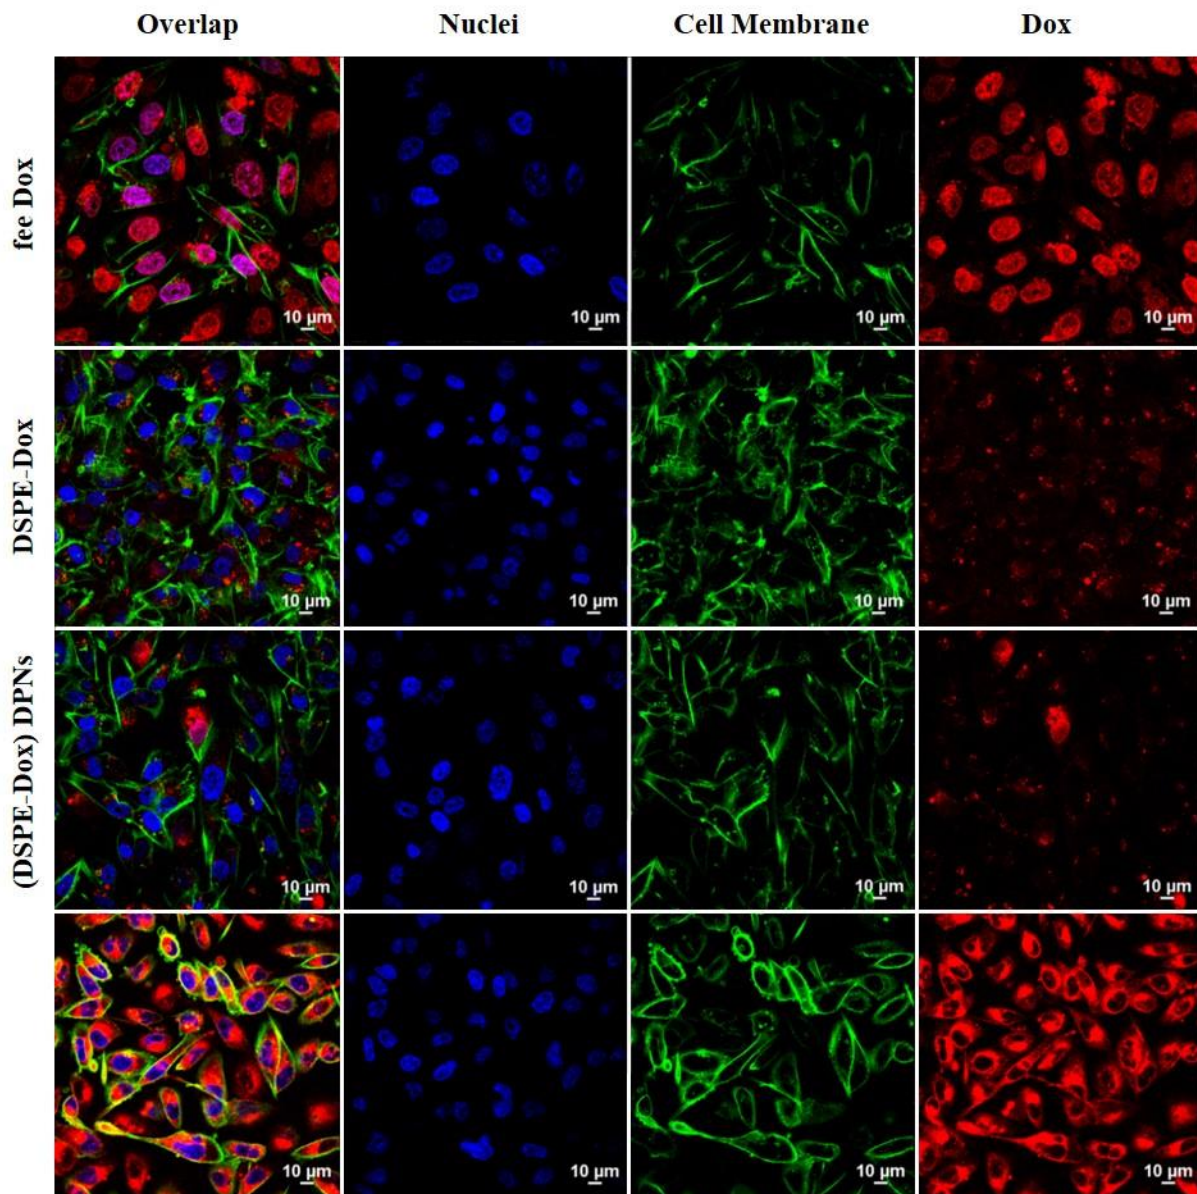

**Supplementary Figure.3.** Confocal microscopy analysis of free-DOX, DSPE-DOX, (DSPE-DOX)DPNs and LA-DOX at 48h post-incubation with MDA-MB-231.

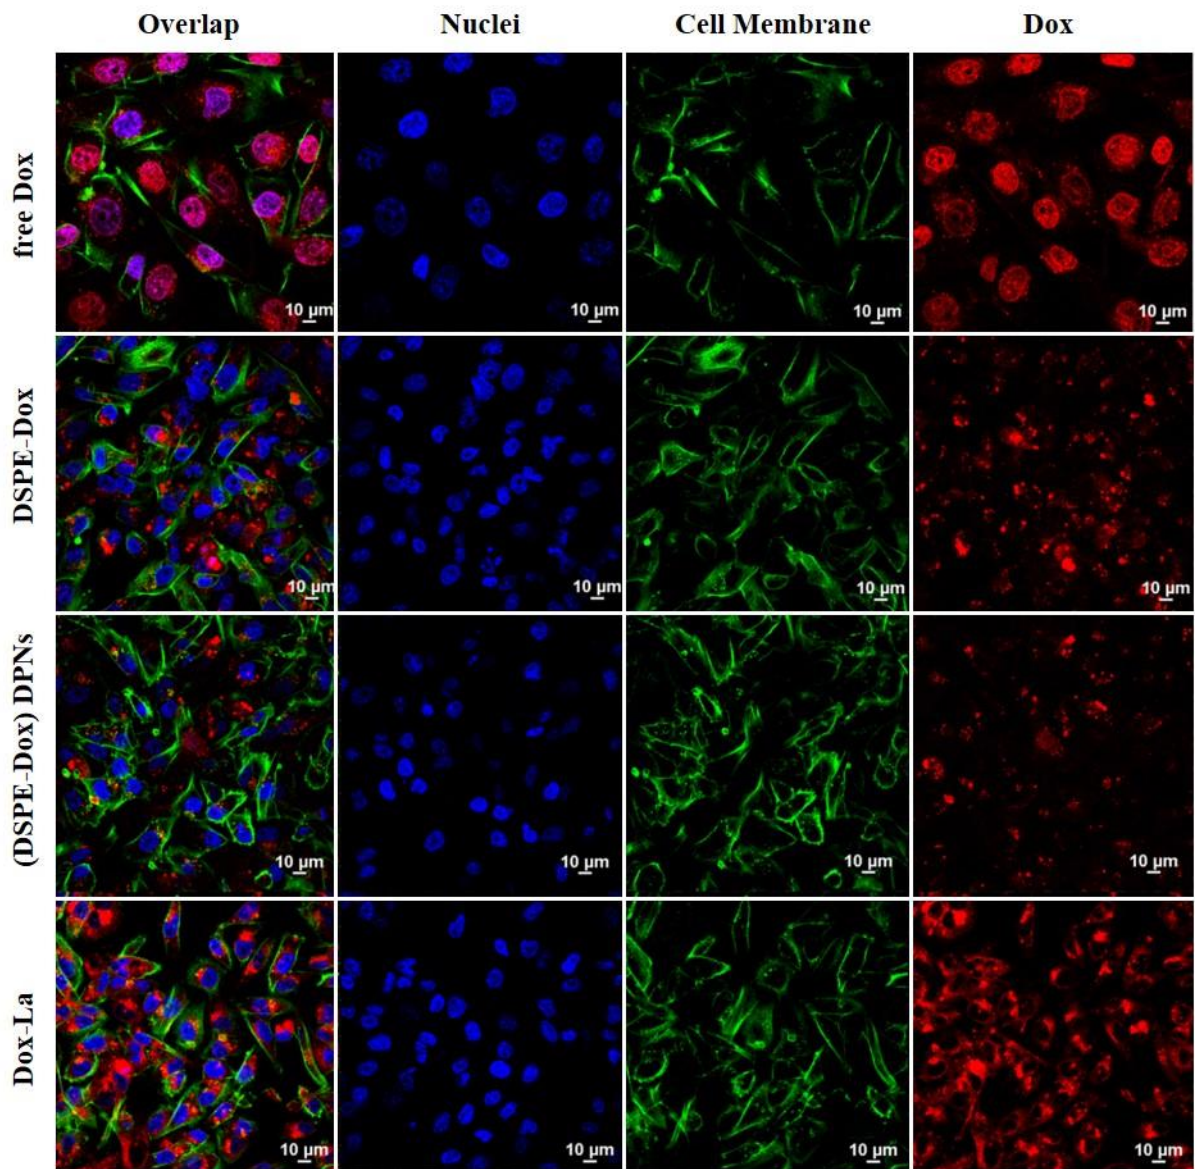

**Supplementary Figure.4.** Confocal microscopy analysis of free-DOX, DSPE-DOX, (DSPE-DOX)DPNs and LA-DOX at 72h post-incubation with MDA-MB-231.

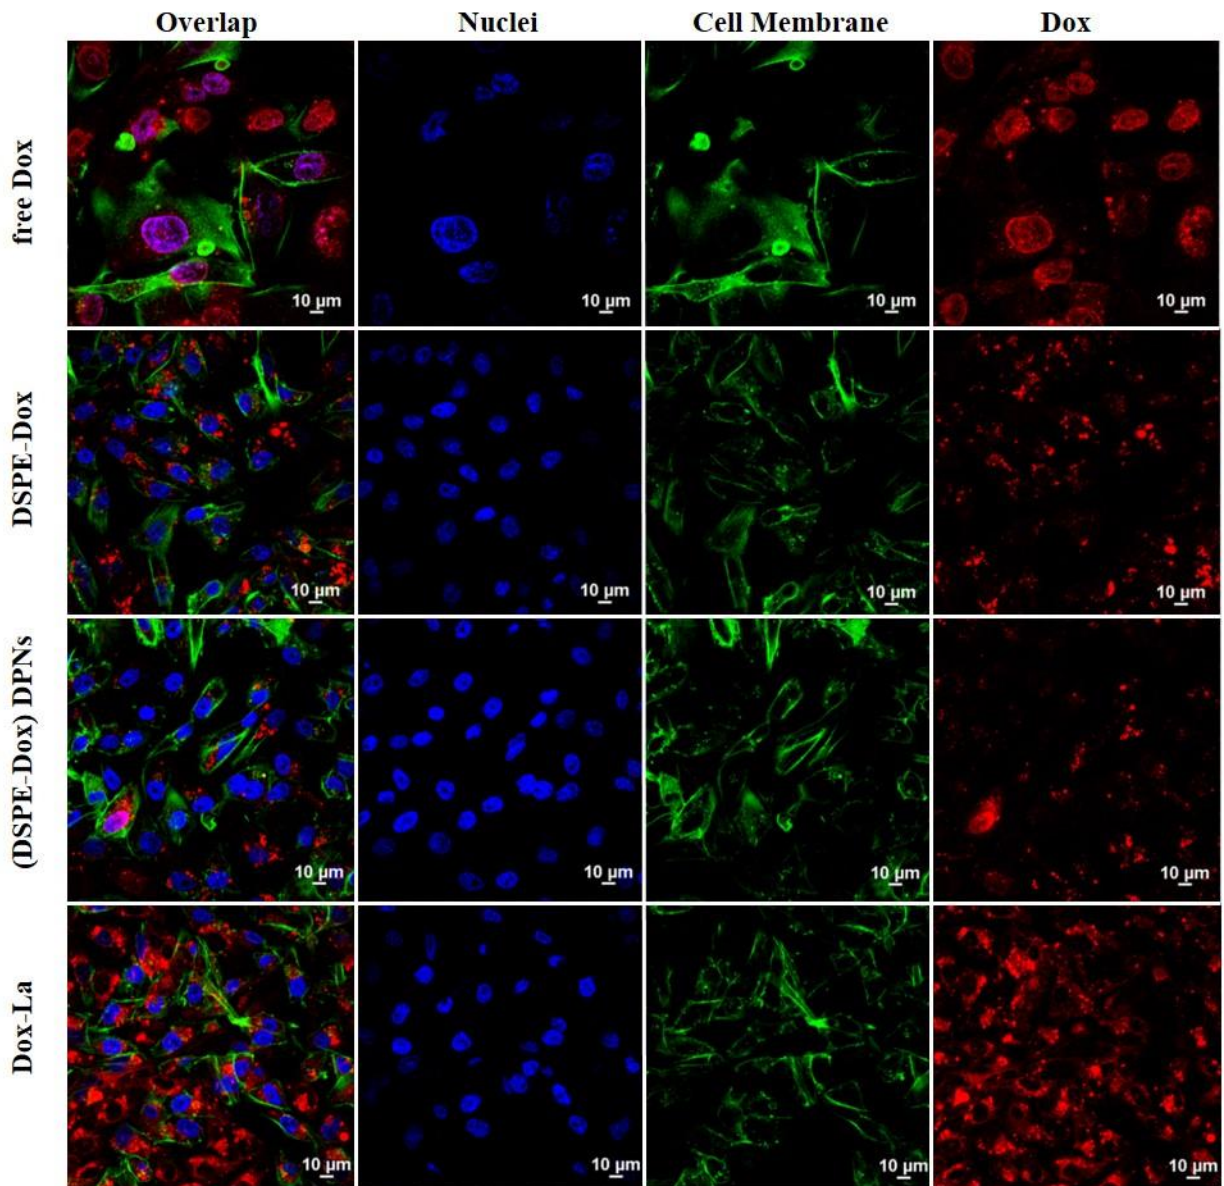

**Supplementary Figure.5.** Confocal microscopy analysis of free-DOX, DSPE-DOX, (DSPE-DOX)DPNs and LA-DOX at 96h post-incubation with MDA-MB-231.
